# Supplementary material for: Pancreatic adenocarcinomas with mature blood vessels have better overall survival
Source: PubMed Central journal article supplement (PMC6362082; doi:10.1038/s41598-018-37909-5), 2019-02-04
Supplement: 41598_2018_37909_MOESM1_ESM.pdf [file 41598_2018_37909_MOESM1_ESM.pdf]

## **Pancreatic adenocarcinomas with mature blood vessels have better overall survival**

Eriko Katsuta<sup>1</sup>, Qianya Qi<sup>2</sup>, Xuan Peng<sup>2</sup>, Steven N. Hochwald<sup>1,3</sup>, Li Yan<sup>2</sup>, Kazuaki Takabe<sup>1,3-7</sup>

<sup>1</sup> Department of Surgical Oncology, Roswell Park Cancer Institute, Buffalo, NY, USA

<sup>2</sup> Department of Biostatistics and Bioinformatics, Roswell Park Cancer Institute, Buffalo, NY, USA

<sup>3</sup> Department of Surgery, University at Buffalo the State University of New York, Jacobs School of Medicine and Biomedical Sciences, Buffalo, NY, USA

<sup>4</sup> Department of Breast Surgery and Oncology, Tokyo Medical University, Tokyo, Japan

<sup>5</sup> Department of Surgery, Yokohama City University, Yokohama, Japan

<sup>6</sup> Department of Surgery, Niigata University Graduate School of Medical and Dental Sciences, Niigata, Japan

<sup>7</sup> Department of Breast Surgery, Fukushima Medical University, Fukushima, Japan

### **Corresponding author**

Kazuaki Takabe, MD, PhD, FACS

Department of Surgical Oncology

Roswell Park Cancer Institute

Elm & Carlton Streets, Buffalo NY 14263 USA

Tel: 716-845-5540, FAX: 716-845-5705

Email: [kazuaki.takabe@roswellpark.org](mailto:kazuaki.takabe@roswellpark.org)

**Supplementary Table 1:** Significantly differentially expressed KEGG pathways between CD31 high and low tumors

| ID       | Description                                          | GeneRatio | BgRatio  | pvalue   | p.adjust |
|----------|------------------------------------------------------|-----------|----------|----------|----------|
| hsa04514 | Cell adhesion molecules (CAMs)                       | 64/874    | 145/7277 | 1.21E-22 | 3.66E-20 |
| hsa04640 | Hematopoietic cell lineage                           | 41/874    | 97/7277  | 3.98E-14 | 4.66E-12 |
| hsa05150 | Staphylococcus aureus infection                      | 30/874    | 56/7277  | 4.64E-14 | 4.66E-12 |
| hsa04062 | Chemokine signaling pathway                          | 55/874    | 185/7277 | 5.07E-11 | 3.82E-09 |
| hsa05144 | Malaria                                              | 24/874    | 49/7277  | 1.97E-10 | 1.18E-08 |
| hsa04380 | Osteoclast differentiation                           | 42/874    | 128/7277 | 3.56E-10 | 1.79E-08 |
| hsa04060 | Cytokine-cytokine receptor interaction               | 66/874    | 270/7277 | 5.99E-09 | 2.58E-07 |
| hsa05140 | Leishmaniasis                                        | 28/874    | 74/7277  | 9.32E-09 | 3.50E-07 |
| hsa05323 | Rheumatoid arthritis                                 | 29/874    | 90/7277  | 3.04E-07 | 1.02E-05 |
| hsa04659 | Th17 cell differentiation                            | 32/874    | 107/7277 | 5.09E-07 | 1.53E-05 |
| hsa05145 | Toxoplasmosis                                        | 33/874    | 113/7277 | 6.21E-07 | 1.65E-05 |
| hsa04660 | T cell receptor signaling pathway                    | 31/874    | 103/7277 | 6.57E-07 | 1.65E-05 |
| hsa05152 | Tuberculosis                                         | 45/874    | 179/7277 | 7.25E-07 | 1.68E-05 |
| hsa04015 | Rap1 signaling pathway                               | 49/874    | 210/7277 | 2.47E-06 | 5.31E-05 |
| hsa04611 | Platelet activation                                  | 33/874    | 123/7277 | 4.94E-06 | 9.92E-05 |
| hsa05142 | Chagas disease (American trypanosomiasis)            | 29/874    | 102/7277 | 5.36E-06 | 0.000101 |
| hsa04658 | Th1 and Th2 cell differentiation                     | 27/874    | 92/7277  | 5.86E-06 | 0.000104 |
| hsa04672 | Intestinal immune network for IgA production         | 18/874    | 49/7277  | 6.91E-06 | 0.000115 |
| hsa05416 | Viral myocarditis                                    | 20/874    | 59/7277  | 8.88E-06 | 0.000141 |
| hsa04610 | Complement and coagulation cascades                  | 24/874    | 79/7277  | 1.00E-05 | 0.000151 |
| hsa04670 | Leukocyte transendothelial migration                 | 30/874    | 112/7277 | 1.37E-05 | 0.000196 |
| hsa04064 | NF-kappa B signaling pathway                         | 26/874    | 95/7277  | 3.39E-05 | 0.000464 |
| hsa05330 | Allograft rejection                                  | 14/874    | 38/7277  | 7.01E-05 | 0.000918 |
| hsa04145 | Phagosome                                            | 35/874    | 152/7277 | 8.98E-05 | 0.001127 |
| hsa04014 | Ras signaling pathway                                | 47/874    | 227/7277 | 0.000104 | 0.001255 |
| hsa05310 | Asthma                                               | 12/874    | 31/7277  | 0.000133 | 0.001541 |
| hsa05200 | Pathways in cancer                                   | 72/874    | 395/7277 | 0.000142 | 0.001588 |
| hsa05321 | Inflammatory bowel disease (IBD)                     | 19/874    | 65/7277  | 0.000148 | 0.00159  |
| hsa05332 | Graft-versus-host disease                            | 14/874    | 41/7277  | 0.000181 | 0.001854 |
| hsa05221 | Acute myeloid leukemia                               | 19/874    | 66/7277  | 0.000185 | 0.001854 |
| hsa04940 | Type I diabetes mellitus                             | 14/874    | 43/7277  | 0.000319 | 0.003051 |
| hsa05320 | Autoimmune thyroid disease                           | 16/874    | 53/7277  | 0.000324 | 0.003051 |
| hsa05133 | Pertussis                                            | 20/874    | 76/7277  | 0.000471 | 0.004296 |
| hsa05166 | HTLV-I infection                                     | 49/874    | 255/7277 | 0.000487 | 0.004314 |
| hsa05322 | Systemic lupus erythematosus                         | 29/874    | 133/7277 | 0.000909 | 0.00782  |
| hsa05162 | Measles                                              | 29/874    | 134/7277 | 0.001031 | 0.008621 |
| hsa04933 | AGE-RAGE signaling pathway in diabetic complications | 23/874    | 99/7277  | 0.001227 | 0.00998  |
| hsa04924 | Renin secretion                                      | 17/874    | 65/7277  | 0.001322 | 0.010473 |
| hsa04666 | Fc gamma R-mediated phagocytosis                     | 21/874    | 91/7277  | 0.002148 | 0.01658  |
| hsa05340 | Primary immunodeficiency                             | 11/874    | 37/7277  | 0.003134 | 0.023014 |
| hsa04022 | cGMP-PKG signaling pathway                           | 32/874    | 163/7277 | 0.003135 | 0.023014 |
| hsa04662 | B cell receptor signaling pathway                    | 17/874    | 71/7277  | 0.003665 | 0.026265 |
| hsa04724 | Glutamatergic synapse                                | 24/874    | 114/7277 | 0.003947 | 0.027632 |
| hsa04921 | Oxytocin signaling pathway                           | 30/874    | 153/7277 | 0.004233 | 0.028027 |
| hsa05202 | Transcriptional misregulation in cancer              | 35/874    | 186/7277 | 0.00426  | 0.028027 |
| hsa04270 | Vascular smooth muscle contraction                   | 25/874    | 121/7277 | 0.004283 | 0.028027 |
| hsa04630 | Jak-STAT signaling pathway                           | 30/874    | 156/7277 | 0.005668 | 0.036298 |
| hsa04510 | Focal adhesion                                       | 36/874    | 199/7277 | 0.007259 | 0.045517 |
| hsa04512 | ECM-receptor interaction                             | 18/874    | 82/7277  | 0.00751  | 0.046135 |
| hsa04650 | Natural killer cell mediated cytotoxicity            | 26/874    | 133/7277 | 0.007741 | 0.046601 |
| hsa04340 | Hedgehog signaling pathway                           | 12/874    | 47/7277  | 0.008025 | 0.047366 |
